# Supplementary material for: Women’s Perceptions and Attitudes to Household Air Pollution Exposure and Capability to Change Cooking Behaviours in Urban Rwanda
Source: MDPI journal article supplement (doi:10.3390/su14031608), 2022-01-29
Supplement: s1 [file s1]

**Topic guide: Interview to obtain opinions and barrier of behaviour changes to cooking practices as a harm reduction interventions to air pollution in Kigali, Rwanda**

**Introduction:**

- Thank the participant for coming today to discuss cooking and air pollution, which will last 30-60 minutes
- Introduce yourself
- Outline the study and confirm people are in agreement to continue by making sure consent has been given.
- Highlight to the participants that they are free to ask any questions throughout and they have the right to decline to answer any questions
- All responses will be confidential. Explain this is a safe place to talk and views and responses will not be discussed outside of the interview.
- Draw to the participants' attention that a recording will be taken – confirm participants are happy with this.

**Main questions**

- 1. Please describe your photo that you provided to illustrate what you think air pollution is?** *If you don't have a photo please describe what you think air pollution is.*
  - a. How do you think this depicts air pollution
  - b. Why did you choose this?
  - c. Are you aware of other forms of air pollution?
- 2. What do you feel are the health effects of cooking smoke?**
  - a. Do you feel you have health issues due to cooking smoke – what are these?
    - i. *Prompt if necessary with health issues:*
      - a. *Respiratory (infections, asthma, COPD)*
      - b. *Issues with the heart*
      - c. *Pregnancy (low birth weight, still births, pre-term birth)*
  - b. Are your children affected by cooking smoke?
    - i. *Prompt if necessary with health issues:*
      - a. *Respiratory (infections, cough, shortness of breath)*
      - b. *Delayed development*
      - c. *Burns for cooking stove*

**The following questions are going to cover question on cooking practices**

- 3. Where should cooking take place?** *Prompt with indoor and outdoor cooking suggestion if necessary*
  - a. Where do you currently cook?
  - b. Why do you think cooking should take place here?
  - c. What else determines your cooking location?
- 4. What would you think about moving cooking outside?** – *Prompt with description of outdoor cooking if necessary*
  - a. Would you take up this practice?
    - i. If yes, why would you move cooking outside?
    - ii. If no, why wouldn't you move cooking outside?
  - b. What issues could you foresee with cooking outside?
  - c. What would you require to be able to move outside?

5. **Do you know of any other behaviours you could change to reduce you or your children's exposure to cooking smoke?**
- a. What about removing children from the cooking area?
  - b. Have you considered changing cooking fuels to reduce levels of air pollution?
  - c. Have you made any of these changes?
  - d. What stops you from making changes to your cooking practices?
6. **How would you like to learn more about behaviour changes to cooking practices to improve the health of your family?**
- a. *Prompt with examples if necessary:*
    - i. *Educational sessions (in Umaganda)*
    - ii. *Leaflets/advertisement campaigns*
    - iii. *Economic incentives*
    - iv. *Others.....*
  - b. What would you like to gain from it?
7. **Is there anything else you would like to comment on cooking and air pollution?**

**END** – Thank participants for contributing their time and sum up discussion
