# Supplementary material for: Women’s Perceptions and Attitudes to Household Air Pollution Exposure and Capability to Change Cooking Behaviours in Urban Rwanda
Source: MDPI journal article supplement (doi:10.3390/su14031608), 2022-01-29
Supplement: s1 [file s1]

Archive with 1 entries (1 files):
- sustainability-1500141-supplementary.pdf
